# Supplementary material for: Development and Evaluation of a Website With Patients Experiences of Multiple Sclerosis: A Mixed Methods Study
Source: Research Square preprint supplement (doi:10.21203/rs.3.rs-846116/v1), 2021-09-09
Supplement: Supplementary file 3 [file 9ca0084011c78c34edfd6f00.docx]

**Login details to the website:**

[www.ms-erfahrungen.de](http://www.ms-erfahrungen.de)

User name (Nutzername): User_MSErf

Password (Passwort): TestMSErf!
