# Supplementary figures and images for: Development and Evaluation of a Website With Patients Experiences of Multiple Sclerosis: A Mixed Methods Study
Source: Research Square preprint supplement (doi:10.21203/rs.3.rs-846116/v1), 2021-09-09

#
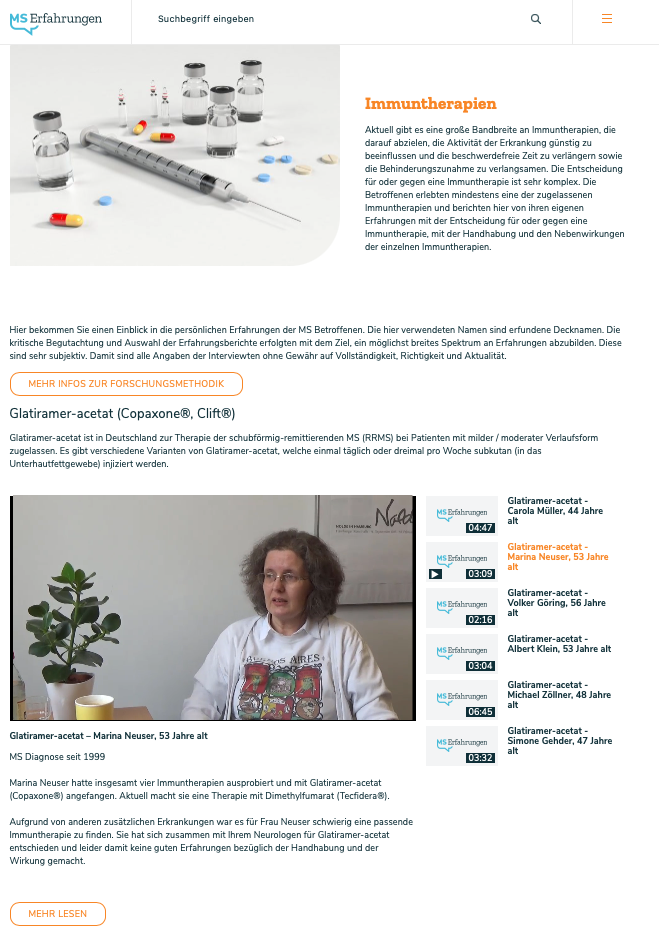

Supplement: Supplementary file 1 [file 7d58355a2d974e8a7f270a53.docx]
